# Supplementary material for: 3-O-ethyl-l-ascorbic acid: Characterisation and investigation of single solvent systems for delivery to the skin
Source: PubMed Central journal article supplement (PMC6733298; doi:10.1016/j.ijpx.2019.100025), 2019-07-19
Supplement: mmc1.pdf [file mmc1.pdf]

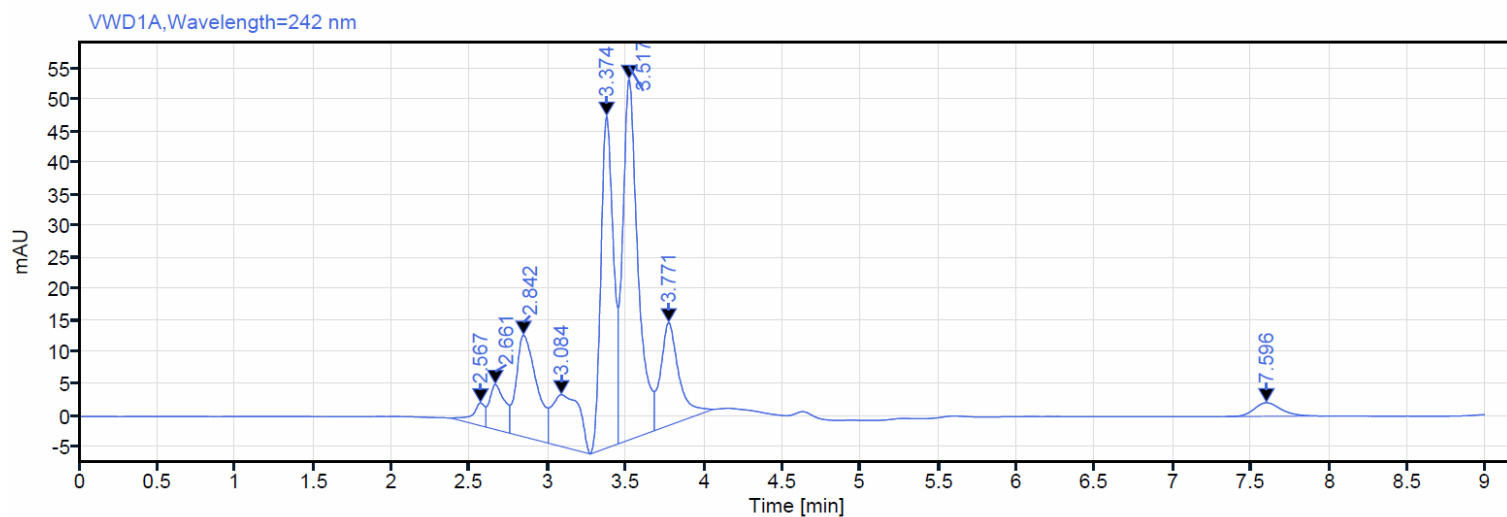

**Figure S1 – Sample HPLC chromatogram of EA detected in the receptor solution during permeation study at the 12h time point.**

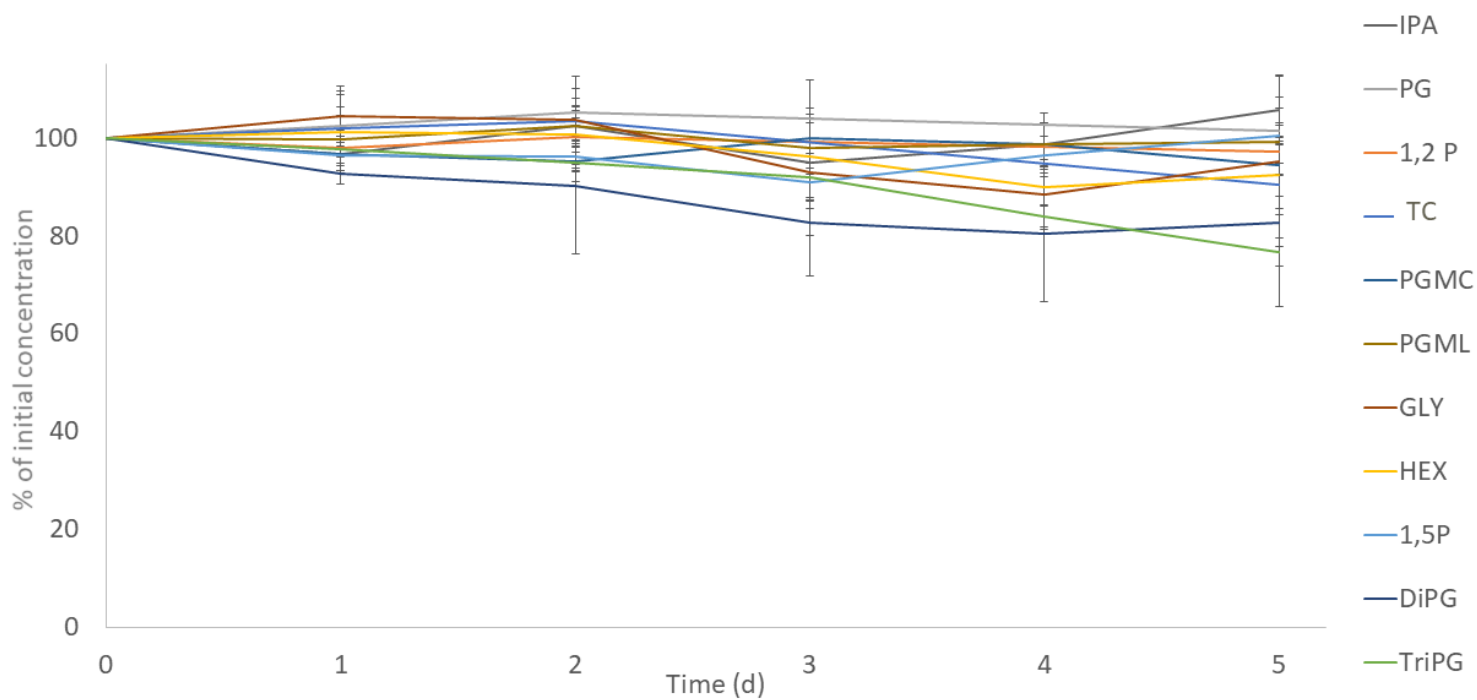

**Figure S2 – Stability of 2 % (w/w) EA in various solvents over a 5-day period (mean  $\pm$  SD, n=3).**
